# Supplementary material for: An extracellular matrix mimicking alginate hydrogel scaffold manipulates an inflammatory microenvironment and improves peripheral nerve regeneration by controlled melatonin release
Source: Royal Society of Chemistry journal article supplement (doi:10.1039/d3tb01727c), 2023-01-01
Supplement: d3tb01727c1.pdf [file d3tb01727c1.pdf]

SUPPLEMENTARY MATERIAL

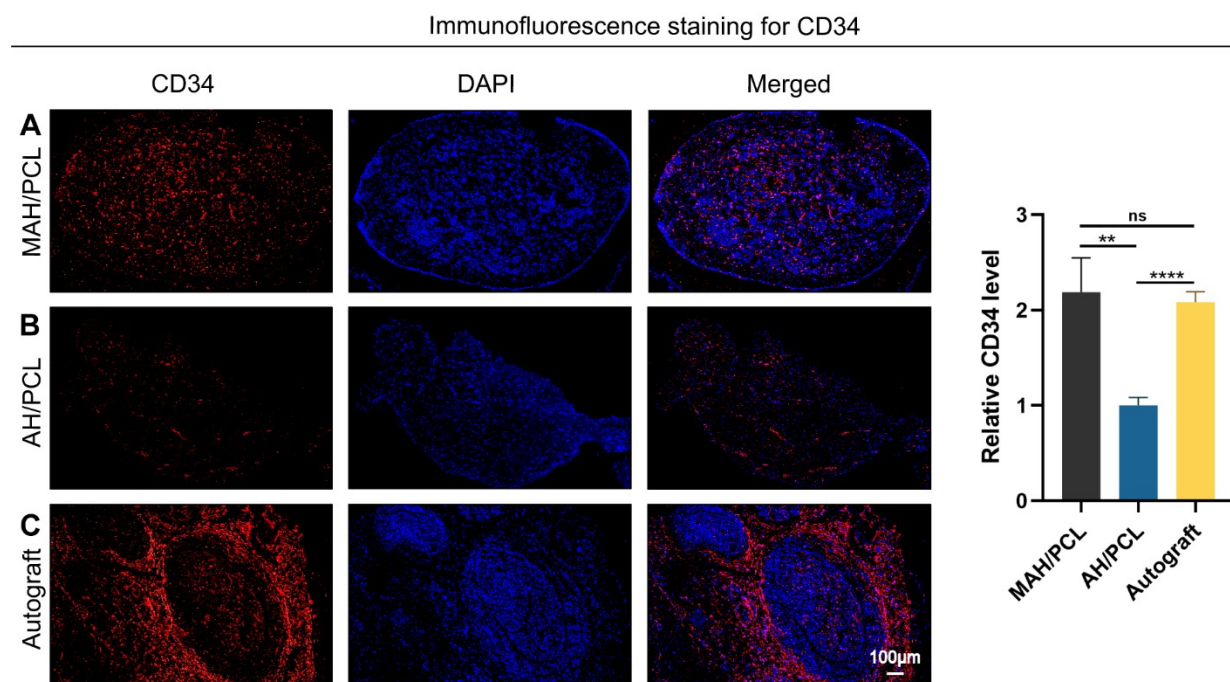

**Fig. S1** - Immunofluorescence staining for CD34 for the regenerated sciatic nerve morphology observation in MAH/PCL (**A**), AH/PCL (**B**), and autograft (**C**) groups. The relatively CD34 levels were evaluated in MAH/PCL, AH/PCL, and autograft groups. \* $p < 0.05$ , \*\* $p < 0.01$ , \*\*\* $p < 0.001$ , \*\*\*\* $p < 0.0001$ , ns: no significant difference.
